# Supplementary material for: Frequency ofTNFA,INFG, andIL10Gene Polymorphisms and Their Association with MalariaVivaxand Genomic Ancestry
Source: Hindawi journal article supplement (doi:10.1155/2016/5168363), 2016-01-01
Supplement: f1 [file 5168363.f1.pdf]

## Supplementary Files

**Supplementary Table 1.** Tests of the genetic association of the polymorphisms between vivax malaria-infected and non-infected individuals.

| Gene        | SNP      | Model        | Genotype       | OR (95% CI)      | p-value | p-value (adjusted) <sup>a</sup> |
|-------------|----------|--------------|----------------|------------------|---------|---------------------------------|
| <i>IFNG</i> | -874A>T  | Heterozygous | AT vs AA/TT    | 0.54 (0.26-1.09) | 0.08    | 0.08                            |
| <i>TNF</i>  | -1031T>C | Additive     | TT vs TC vs CC | 0.69 (0.37-1.29) | 0.24    | 0.23                            |
| <i>TNF</i>  | -308G>A  | Additive     | GG vs GA vs AA | 0.60 (0.30-1.22) | 0.13    | 0.14                            |
| <i>TNF</i>  | -238G>A  | Dominant     | GG vs GA/AA    | 1.15 (0.37-3.57) | 0.81    | 0.61                            |
| <i>IL10</i> | -819C>T  | Heterozygous | CT vs CC/TT    | 0.69 (0.34-1.37) | 0.28    | 0.36                            |
| <i>IL10</i> | -592C>A  | Additive     | CC vs CA vs AA | 0.76 (0.42-1.35) | 0.35    | 0.16                            |

<sup>a</sup>Adjusted for gender, age and previous history of malaria.

Odds ratios (OR), 95% confidence interval (CI)

**Supplementary Table 2.** Genotypic frequencies and proportions of African, European and Native American ancestry according to genotype.

| Genotype             | Frequency (%) | African <sup>a</sup> | European <sup>a</sup> | Native American <sup>a</sup> |
|----------------------|---------------|----------------------|-----------------------|------------------------------|
| <i>IFNG</i> -874A>T  | n=129         |                      |                       |                              |
| A/A                  | 43.4          | 0.321 ± 0.124        | 0.431 ± 0.137         | 0.247 ± 0.107                |
| A/T                  | 48.8          | 0.306 ± 0.119        | 0.448 ± 0.124         | 0.246 ± 0.100                |
| T/T                  | 7.8           | 0.297 ± 0.080        | 0.497 ± 0.132         | 0.206 ± 0.098                |
| P                    |               | 0.82                 | 0.35                  | 0.49                         |
| <i>TNFA</i> -1031T>C | n=140         |                      |                       |                              |
| T/T                  | 52.9          | 0.308 ± 0.116        | 0.456 ± 0.126         | 0.236 ± 0.091                |
| T/C                  | 44.3          | 0.310 ± 0.121        | 0.435 ± 0.138         | 0.254 ± 0.111                |
| C/C                  | 2.8           | 0.347 ± 0.096        | 0.376 ± 0.012         | 0.277 ± 0.091                |
| P                    |               | 0.74                 | 0.36                  | 0.54                         |
| <i>TNFA</i> -308G>A  | n=140         |                      |                       |                              |
| G/G                  | 74.3          | 0.317 ± 0.114        | 0.430 ± 0.127         | 0.253 ± 0.101                |
| G/A                  | 24.3          | 0.292 ± 0.130        | 0.482 ± 0.134         | 0.226 ± 0.098                |
| A/A                  | 1.4           | 0.272                | 0.550                 | 0.178                        |
| P                    |               | 0.59                 | 0.07                  | 0.19                         |
| <i>TNFA</i> -238A>G  | n=140         |                      |                       |                              |
| A/A                  | 89.3          | 0.310 ± 0.121        | 0.447 ± 0.128         | 0.243 ± 0.098                |
| A/G                  | 10.0          | 0.301 ± 0.091        | 0.423 ± 0.150         | 0.268 ± 0.124                |
| G/G                  | 0.7           | 0.337                | 0.411                 | 0.252                        |
| P                    |               | 0.98                 | 0.78                  | 0.68                         |
| <i>IL10</i> -819C>T  | n=140         |                      |                       |                              |
| C/C                  | 41.4          | 0.320 ± 0.121        | 0.445 ± 0.136         | 0.235 ± 0.099                |
| C/T                  | 48.6          | 0.298 ± 0.108        | 0.447 ± 0.126         | 0.259 ± 0.100                |
| T/T                  | 10.0          | 0.328 ± 0.148        | 0.431 ± 0.132         | 0.241 ± 0.108                |
| P                    |               | 0.54                 | 0.92                  | 0.53                         |
| <i>IL10</i> -592C>A  | n=140         |                      |                       |                              |
| C/C                  | 43.6          | 0.322 ± 0.120        | 0.443 ± 0.138         | 0.235 ± 0.097                |
| C/A                  | 50.1          | 0.297 ± 0.106        | 0.447 ± 0.122         | 0.257 ± 0.099                |
| A/A                  | 5.7           | 0.341 ± 0.182        | 0.433 ± 0.151         | 0.226 ± 0.136                |
| P                    |               | 0.32                 | 0.92                  | 0.42                         |

<sup>a</sup>Ancestry expressed as the mean ± SD
